# Supplementary material for: Blast-Related Mild Traumatic Brain Injury: A Bayesian Random-Effects Meta-Analysis on the Cognitive Outcomes of Concussion among Military Personnel
Source: Springer Nature journal article supplement (doi:10.1007/s11065-014-9271-8), 2014-09-24
Supplement: MOESM2 [file 8952482]

**Electronic Supplementary Material 2**

**Article Title:** Blast-related Mild Traumatic Brain Injury: A Bayesian Random-Effects Meta-

Analysis on the Cognitive Outcomes of Concussion among Military Personnel

**Journal Title:** *Neuropsychology Review*

**Authors:** J. E. Karr, C. N. Areshenkoff, E. C. Duggan, & M. A. Garcia-Barrera

**Affiliation:** University of Victoria

**Email:** jkarr@uvic.ca

Table A1. *Test to Construct Allocation by Study*

| Author | Construct | Neurocognitive Test |
| --- | --- | --- |
|  |  |  |
| Amick et al., 2013 | Inhibition | Affective Go/No-go RT (Positive Block) |
|  |  | Affective Go/No-go RT (Negative Block) |
|  |  | Affective Go/No-go Commission Errors (Positive Block) |
|  |  | Affective Go/No-go Commission Errors (Negative Block) |
|  |  | Affective Go/No-go Omissions (Positive Block) |
|  |  | Affective Go/No-go Omissions (Negative Block) |
|  |  | Affective Go/No-go D-prime (Positive Block) |
|  |  | Affective Go/No-go D-Prime (Negative Block) |
|  |  | Affective Go/No-go Criterion (Positive Block) |
|  |  | Affective Go/No-go Criterion (Negative Block) |
|  |  |  |
| Nelson et al., 2010 | Fluency | COWAT |
|  | Inhibition | Stroop Color-Word |
|  | Processing Speed | TMT Part A |
|  |  | Digit Symbol |
|  |  | Stroop Word |
|  |  | Stroop Color |
|  | Set Shifting | TMT Part B |
|  | Verbal Delayed Memory | CVLT-II Long Free |
|  | Verbal Memory | CVLT-II Trials 1-5 |
|  | Working Memory | WAIS-III Digit Span |
|  |  |  |
| Nelson et al., 2012 | Fluency | COWAT |
|  | Inhibition | Stroop Color-Word |
|  | Working Memory | WAIS-III Digit Span |
|  | Processing Speed | TMT Part A |
|  |  | Stroop Word |
|  |  | Stroop Color |
|  |  | WAIS-III Coding |
|  | Set Shifting | TMT Part B |
|  | Verbal Memory | CVLT-II Trials 1-5 |
|  | Verbal Delayed Memory | CVLT-II Long Free Recall |
|  | Visual Memory | RCFT 3' Delay |
|  | Visual-Spatial Skills | RCFT Copy Raw |
|  |  | WAIS-III Block Design |
|  |  |  |
| Kontos et al., 2013 | Processing Speed | ImPACT Visual Processing Speed |
|  |  | ImPACT Response Time |
|  | Verbal Memory | ImPACT Verbal Memory |
|  | Visual Memory | ImPACT Visual Memory |
|  |  |  |
| Vakhtin et al., 2013 | Fluency | COWAT |
|  | Inhibition | Stroop |
|  | Processing Speed | TMT-A |
|  |  | Digit Symbol |
|  |  | Symbol Search |
|  | Set Shifting | TMT-B |
|  |  | WCST |
|  | Verbal Delayed Memory | CVLT-II Long Delay |
|  | Verbal Memory | CVLT-II Short Delay |
|  | Working Memory | Digit Span Composite |
|  |  | PASAT |
|  |  |  |
| Peskind et al., 2011 | Attention | CNP Attention Response Time |
|  | Verbal Memory | CNP Verbal Memory Response Time |
|  | Visual-Spatial Skills | CNP Spatial Ability Response Time |
|  | Working Memory | CNP Working Memory Accuracy |
|  |  |  |
| Verfaellie et al., 2014 | Fluency | Verbal fluency |
|  | Inhibition | Stroop inhibition |
|  | Motor | Trails motor speed |
|  |  | Finger tapping dominant |
|  |  | Finger tapping nondominant |
|  |  | Grooved pegboard dominant |
|  |  | Grooved pegboard nondominant |
|  | Processing Speed | Digit Symbol |
|  |  | Stroop word + color naming |
|  |  | Trails letter + number sequencing |
|  | Set Shifting | Trails number-letter switching |
|  | Verbal Delayed Memory | CVLT delayed recall |
|  | Verbal Delayed Memory | CVLT recognition |
|  | Verbal Memory | CVLT total trials 1 - 5 |
|  | Visual Delayed Memory | BVMT delayed recall |
|  |  | BVMT delayed recognition |
|  | Visual Memory | BVMT total trials 1 - 5 |
|  | Working Memory | Digit Span backwards |
|  |  | Consonant trigrams mean |
|  |  |  |
| Shadera-Ochsner  et al., 2013 | Attention | CPT-II Omissions |
|  | Fluency | D-KEFS Letter Fluency |
|  | Fluency | D-KEFS Category Fluency |
|  | Inhibition | CPT-II Comissions |
|  | Inhibition | D-KEFS Inhibition |
|  | Processing Speed | D-KEFS Color Naming |
|  | Processing Speed | D-KEFS Word Reading |
|  | Processing Speed | WAIS-IV Processing Speed Index |
|  | Set Shifting | D-KEFS Category Switching |
|  | Set Shifting | D-KEFS Inhibition-Switch |
|  | Set Shifting | D-KEFS Trail Switch Trial |
|  | Verbal Memory | CVLT-II Trials 1-5 |
|  | Verbal Memory | CVLT-II Short Delay Free Recall |
|  | Verbal Delayed Memory | CVLT-II Long Delay Free Recall |
|  | Visual Delayed Memory | BVMT-R Delayed Recall |
|  |  |  |
| Scheibel et al., 2012 | Inhibition | ASRC Task (Red or Incongruent) Accuracy |
|  |  | ASRC Task (Red or Incongruent) Response Time |
|  | Processing Speed | ASRC Task (Blue or Congruent) Accuracy |
|  |  | ASRC Task (Blue or Congruent) Response Time |

Note. ASRC = Arrows Stimulus-Response Compatibility, BVMT-R = Brief Visuospatial Memory Test–Revised; CNP = COWAT = Controlled Oral Word Association Test, CNP = Computerized Neurocognitive Battery – Penn, CPT = Continuous Performance Test, CVLT = California Verbal Learning Test, D-KEFS = Delis-Kaplan Executive Function System, ImPACT = Immediate Post-Concussion Assessment and Cognitive Testing, PASAT = Paced Auditory Serial Addition Test, RCFT = Rey Complex Figure Test, TMT = Trail Making Test, WAIS = Wechsler Adult Intelligence Scale, WCST = Wisconsin Card Sorting Test.
