# Supplementary material for: Blast-Related Mild Traumatic Brain Injury: A Bayesian Random-Effects Meta-Analysis on the Cognitive Outcomes of Concussion among Military Personnel
Source: Springer Nature journal article supplement (doi:10.1007/s11065-014-9271-8), 2014-09-24
Supplement: MOESM4 [file 8952482]

**Electronic Supplementary Material 4**

**Article Title:** Blast-related Mild Traumatic Brain Injury: A Bayesian Random-Effects Meta-

Analysis on the Cognitive Outcomes of Concussion among Military Personnel

**Journal Title:** *Neuropsychology Review*

**Authors:** J. E. Karr, C. N. Areshenkoff, E. C. Duggan, & M. A. Garcia-Barrera

**Affiliation:** University of Victoria

**Email:** jkarr@uvic.ca


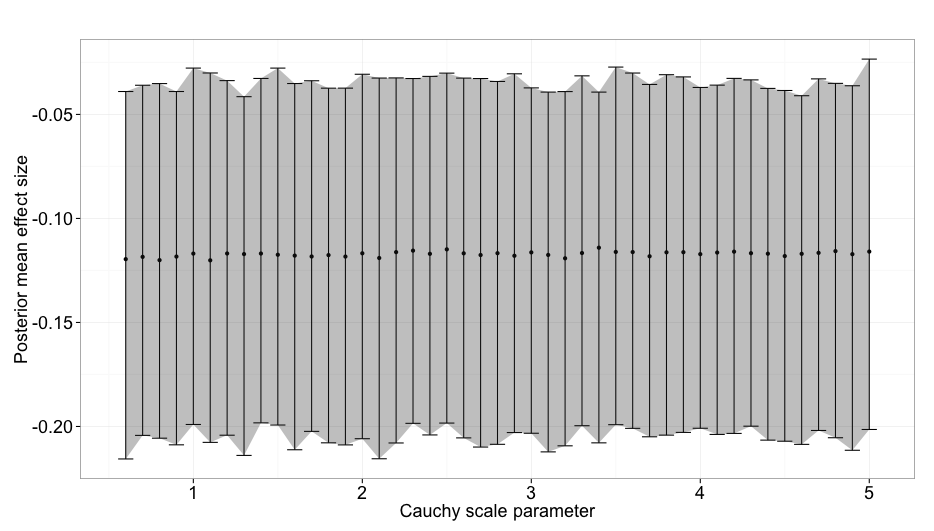


*Figure A1*. Results of the sensitivity analysis for the effect of the Cauchy scale parameter on posterior mean estimates.Model was fit for different values of the Cauchy scale parameter and the resulting posterior means and highest density intervals are plotted above. The plot visually demonstrates that the resulting estimates are not sensitive to the precise value of the prior used.
